# Supplementary material
Source: MDPI journal article supplement (https://www.mdpi.com/2073-4395/13/5/1261)
Supplement: s1 [file s1]

# **Metabolic, Nutritional and Morphophysiological Behavior of Eucalypt Genotypes Differing in Dieback Resistance in Field When Submitted to PEG-Induced Water Deficit**

Journal name: *Agronomy*

**Electronic Supplementary Material**

## Supplementary Method

|        |                                                | Conversion                                                  | Reference |
|--------|------------------------------------------------|-------------------------------------------------------------|-----------|
| Step 1 | Obtaining the cryoscope measures ( <u>°H</u> ) | °H values                                                   |           |
| Step 2 | Converting °H to <u>°C</u> (freezing point)    | $= ((0.1915 * (-^{\circ}\text{H}) - (-0.0004785)) / 0.199)$ | [34,35]   |
| Step 3 | Converting °C (freezing point) to <u>Osmol</u> | $= ((-^{\circ}\text{C}) / 1.86)$                            | [36]      |
| Step 4 | Converting Osmol to <u>MPa</u>                 | $= -\text{Osmol} * 2.479$                                   | [37]      |
| Step 5 | Obtaining the MPa estimated measures           | MPa converted values                                        |           |

**Table S1.** ANOVA performed to indicate the effect of genotypes (SuzT - tolerant; SuzMT - moderately tolerant; SuzTP – in testing phase; SuzS - susceptible to dieback), treatments (Control; 100 PEG; 300 PEG) and their interaction on water potential, morphological, physiological and nutritional variables and on leaf metabolites.

| Anova (F-test) - Osmotic potential and Morphological variables |                   |          |                 |              |              |           |         |            |      |        |         |
|----------------------------------------------------------------|-------------------|----------|-----------------|--------------|--------------|-----------|---------|------------|------|--------|---------|
| Factors                                                        | Osmotic potential | Diameter | No. of branches | No. of nodes | Plant height | Leaf area |         |            |      |        |         |
| Genotype                                                       | 0.43              | 21.93**  | 15.59**         | 14.39**      | 4.50**       | 14.56**   |         |            |      |        |         |
| Treatment                                                      | 582.49**          | 10.40**  | 30.16**         | 43.23**      | 12.86**      | 12.70**   |         |            |      |        |         |
| Gen x Treat                                                    | 0.49              | 1.54     | 1.19            | 1.15         | 1.39         | 1.41      |         |            |      |        |         |
| Anova (F-test) - Morphological variables                       |                   |          |                 |              |              |           |         |            |      |        |         |
| Factors                                                        | LDM               | SDM      | RDM             | TDM          | F/TDM        | S/TDM     | R/TDM   | Root/shoot |      |        |         |
| Genotype                                                       | 4.82**            | 5.52**   | 0.38            | 4.76**       | 3.25*        | 3.72*     | 3.19*   | 3.13*      |      |        |         |
| Treatment                                                      | 0.44              | 5.40*    | 1.78            | 2.35         | 6.62*        | 2.25      | 0.55    | 0.51       |      |        |         |
| Gen x Treat                                                    | 0.65              | 0.48     | 1.35            | 0.77         | 0.63         | 0.42      | 1.13    | 0.85       |      |        |         |
| Anova (F-test) - Physiological variables                       |                   |          |                 |              |              |           |         |            |      |        |         |
| Factors                                                        | E                 | gs       | A               | WUE          | WUEi         | Ci/Ca     |         |            |      |        |         |
| Genotype                                                       | 2.14              | 2.34     | 4.67**          | 1.85         | 2.54         | 3.50*     |         |            |      |        |         |
| Treatment                                                      | 10.88**           | 2.46     | 5.43*           | 0.92         | 1.06         | 0.55      |         |            |      |        |         |
| Gen x Treat                                                    | 0.72              | 1.05     | 0.94            | 0.34         | 0.72         | 0.74      |         |            |      |        |         |
| Anova (F-test) - Nutritional variables                         |                   |          |                 |              |              |           |         |            |      |        |         |
| Factors                                                        | N                 | P        | K               | Ca           | Mg           | S         | Zn      | Fe         | Mn   | Cu     | B       |
| Genotype                                                       | 11.26**           | 6.45**   | 10.51**         | 11.94**      | 21.35**      | 8.85**    | 22.56** | 5.99       | 2.49 | 7.78** | 16.10** |
| Treatment                                                      | 1.39              | 1.92     | 2.3             | 1.2          | 3.44         | 1.6       | 1.99    | 0.04       | 1.17 | 5.43*  | 6.56*   |
| Gen x Treat                                                    | 2.27              | 0.34     | 1.05            | 1.54         | 1.15         | 2.68*     | 0.598   | 1.06       | 0.87 | 5.65** | 1.49    |
| Anova (F-test) - Leaf metabolites                              |                   |          |                 |              |              |           |         |            |      |        |         |
| Factors                                                        | Amino acids       | Proteins | Starch          | Glucose      | Fructose     | Sucrose   |         |            |      |        |         |
| Genotype                                                       | 10.85**           | 1.28     | 10.77**         | 1.61         | 2.66         | 1.54      |         |            |      |        |         |
| Treatment                                                      | 2.86              | 5.68*    | 1.05            | 1.77         | 1.93         | 3.4       |         |            |      |        |         |
| Gen x Treat                                                    | 6.07**            | 0.93     | 0.55            | 0.59         | 0.88         | 1.05      |         |            |      |        |         |

\* and \*\* indicate the statistical significance at  $p < 0.05$  and  $p < 0.01$  by F-test, respectively. The data are expressed as F-value.

**Table S2.** Statistical p-value performed to indicate the effect of genotypes (SuzT - tolerant; SuzMT - moderately tolerant; SuzTP – in testing phase; SuzS - susceptible to dieback), treatments (Control; 100 PEG; 300 PEG) and their interaction on water potential, morphological, physiological and nutritional variables and on leaf metabolites.

| P-value - Osmotic potential and Morphological variables |                   |          |                 |              |              |           |         |            |         |        |         |
|---------------------------------------------------------|-------------------|----------|-----------------|--------------|--------------|-----------|---------|------------|---------|--------|---------|
| Factors                                                 | Osmotic potential | Diameter | No. of branches | No. of nodes | Plant height | Leaf area |         |            |         |        |         |
| Genotype                                                | 1.00 ns           | 0.00**   | 0.00**          | 0.00**       | 0.009**      | 0.00**    |         |            |         |        |         |
| Treatment                                               | 0.00**            | 0.002**  | 0.00**          | 0.00**       | 0.001**      | 0.001**   |         |            |         |        |         |
| Gen x Treat                                             | 1.00 ns           | 0.19 ns  | 0.33 ns         | 0.35 ns      | 0.24 ns      | 0.24 ns   |         |            |         |        |         |
| P-value - Morphological variables                       |                   |          |                 |              |              |           |         |            |         |        |         |
| Factors                                                 | LDM               | SDM      | RDM             | TDM          | L/TDM        | S/TDM     | R/TDM   | Root/shoot |         |        |         |
| Genotype                                                | 0.006**           | 0.003**  | 1.00 ns         | 0.007**      | 0.03*        | 0.02*     | 0.03*   | 0.03*      |         |        |         |
| Treatment                                               | 1.00 ns           | 0.021*   | 0.21 ns         | 0.14 ns      | 0.012*       | 0.15 ns   | 1.00 ns | 1.00 ns    |         |        |         |
| Gen x Treat                                             | 1.00 ns           | 1.00 ns  | 0.26 ns         | 1.00 ns      | 1.00 ns      | 1.00 ns   | 0.36 ns | 1.00 ns    |         |        |         |
| P-value - Physiological variables                       |                   |          |                 |              |              |           |         |            |         |        |         |
| Factors                                                 | E                 | gs       | A               | WUE          | WUEi         | Ci/Ca     |         |            |         |        |         |
| Genotype                                                | 0.11 ns           | 0.09 ns  | 0.007**         | 0.15 ns      | 0.07 ns      | 0.02*     |         |            |         |        |         |
| Treatment                                               | 0.002**           | 0.12 ns  | 0.02*           | 1.00 ns      | 0.37 ns      | 1.00 ns   |         |            |         |        |         |
| Gen x Treat                                             | 1.00 ns           | 0.41 ns  | 1.00 ns         | 1.00 ns      | 1.00 ns      | 1.00 ns   |         |            |         |        |         |
| P-value - Nutritional variables                         |                   |          |                 |              |              |           |         |            |         |        |         |
| Factors                                                 | N                 | P        | K               | Ca           | Mg           | S         | Zn      | Fe         | Mn      | Cu     | B       |
| Genotype                                                | 0.00**            | 0.0015** | 0.00**          | 0.00**       | 0.00**       | 0.00**    | 0.00**  | 0.002**    | 0.07 ns | 0.00** | 0.00**  |
| Treatment                                               | 0.28 ns           | 0.19 ns  | 0.14 ns         | 0.33 ns      | 0.06 ns      | 0.24 ns   | 0.18 ns | 1.00 ns    | 0.34 ns | 0.02*  | 0.01*   |
| Gen x Treat                                             | 0.058 ns          | 1.00 ns  | 0.41 ns         | 0.19 ns      | 0.35 ns      | 0.03*     | 1.00 ns | 0.40 ns    | 1.00 ns | 0.00** | 0.21 ns |
| P-value - Leaf metabolites                              |                   |          |                 |              |              |           |         |            |         |        |         |
| Factors                                                 | Amino acids       | Proteins | Starch          | Glucose      | Fructose     | Sucrose   |         |            |         |        |         |
| Genotype                                                | 0.00**            | 0.29 ns  | 0.00**          | 0.20 ns      | 0.06 ns      | 0.22 ns   |         |            |         |        |         |
| Treatment                                               | 0.09 ns           | 0.018*   | 0.38 ns         | 0.21 ns      | 0.18 ns      | 0.06 ns   |         |            |         |        |         |
| Gen x Treat                                             | 0.00**            | 1.00 ns  | 1.00 ns         | 1.00 ns      | 1.00         | 0.41 ns   |         |            |         |        |         |

\* and \*\* indicate the statistical significance at  $p < 0.05$  and  $p < 0.01$ . ns indicates a non-significant statistical difference at  $p > 0.05$ . The data are expressed as P-value.

**Table S3.** Sulfur (S) and copper (Cu) concentration in leaves of eucalyptus genotypes with different levels of dieback tolerance in response to water deficit.

| S              |                |                |                |                 |
|----------------|----------------|----------------|----------------|-----------------|
|                | SuzT           | SuzMT          | SuzTP          | SuzS            |
| <b>Control</b> | 0.20 ± 0.01 Ba | 0.24 ± 0.01 Ba | 0.30 ± 0.01 Aa | 0.21 ± 0.01 Ba  |
| <b>100 PEG</b> | 0.21 ± 0.01 Aa | 0.25 ± 0.01 Aa | 0.25 ± 0.03 Ab | 0.23 ± 0.01 Aa  |
| <b>300 PEG</b> | 0.23 ± 0.01 Aa | 0.20 ± 0.01 Aa | 0.25 ± 0.02 Ab | 0.20 ± 0.01 Aa  |
| Cu             |                |                |                |                 |
|                | SuzT           | SuzMT          | SuzTP          | SuzS            |
| <b>Control</b> | 1.14 ± 0.35 Ba | 5.98 ± 0.09 Aa | 2.78 ± 0.69 Ba | 3.66 ± 0.66 ABa |
| <b>100 PEG</b> | 2.08 ± 0.75 Aa | 0.50 ± 0.50 Ab | 3.02 ± 0.78 Aa | 2.34 ± 0.59 Aa  |
| <b>300 PEG</b> | 0.96 ± 0.15 Ba | 7.28 ± 1.87 Aa | 3.70 ± 0.79 Ba | 2.12 ± 0.82 Ba  |

\* Means followed by the same capital letters on the horizontal and lower-case letters on vertical do not differ from each other by the Tukey test at 5% probability level. Values indicate mean ± standard error of 5 plants. Sulfur expressed in dag kg<sup>-1</sup>, and copper in mg kg<sup>-1</sup>. SuzT - tolerant; SuzMT - moderately tolerant; SuzTP – in testing phase; SuzS - susceptible to dieback. Control - plantlets managed according to the nursery standard procedures; 100 PEG – plantlets managed according to the standard procedures, with application of 100 mL of 100 g.L<sup>-1</sup> PEG solution every two days; 300 PEG - plantlets managed according to the standard procedures, with application of 100 mL of 300 g.L<sup>-1</sup> PEG solution every two days.

**Table S4.** Contribution morphological, physiological and nutritional variables of *Eucalyptus* genotypes for the variation of components 1 and 2 of PCA. Variables in bold presented the major contributions.

| Variables       | CP1           | CP2           |
|-----------------|---------------|---------------|
| E               | 0.160         | <b>-0.256</b> |
| gs              | 0.200         | -0.229        |
| A               | 0.141         | <b>-0.292</b> |
| WUE             | -0.095        | -0.019        |
| WUEi            | <b>-0.184</b> | 0.125         |
| Ci/Ca           | 0.160         | -0.004        |
| Leaf DM         | 0.119         | <b>0.292</b>  |
| Stem DM         | <b>0.271</b>  | 0.165         |
| Root DM         | 0.203         | -0.048        |
| Total DM        | <b>0.242</b>  | 0.178         |
| S/TDM           | <b>0.242</b>  | 0.138         |
| L/TDM           | <b>-0.197</b> | 0.177         |
| R/TDM           | -0.062        | <b>-0.314</b> |
| Root/Shoot      | -0.064        | <b>-0.322</b> |
| Diameter        | 0.198         | <b>0.246</b>  |
| No. of branches | <b>0.248</b>  | -0.02         |
| No. of nodes    | 0.207         | -0.212        |
| Plant height    | 0.214         | -0.141        |
| Leaf area       | 0.121         | 0.132         |
| N               | -0.140        | -0.204        |
| P               | <b>0.260</b>  | -0.130        |
| K               | 0.058         | -0.163        |
| Ca              | 0.157         | 0.178         |
| Mg              | 0.229         | -0.014        |
| S               | 0.231         | 0.019         |
| Zn              | <b>0.255</b>  | 0.016         |
| Fe              | 0.206         | 0.086         |
| Mn              | 0.068         | 0.127         |
| Cu              | -0.051        | -0.083        |
| B               | 0.122         | -0.300        |
